# Supplementary material for: Crystallography-based exploration of non-covalent interactions for the design and synthesis of coumarin for stronger protein binding
Source: Royal Society of Chemistry journal article supplement (doi:10.1039/d2cp00082b), 2022-01-01
Supplement: d2cp00082b1.pdf [file d2cp00082b1.pdf]

**Crystallography based exploration of non-covalent interactions to design, synthesis of coumarin for stronger protein binding**

Nayim Sepay\*<sup>a</sup>, Manami Banerjee<sup>b</sup>, Rajibul Islam<sup>c</sup>, Sankar Prasad Dey<sup>d</sup>, Umesh Chandra Halder<sup>c</sup>

<sup>a</sup>Department of Chemistry, Lady Brabourne College, Kolkata-700017, India.

<sup>b</sup>Department of Chemistry, Diamond Harbour Women's University, Sarisha-743368, India.

<sup>c</sup>Department of Chemistry, Jadavpur University, Kolkata-700032, India.

<sup>d</sup>Department of Chemistry, Behala College, Kolkata-700060, India.

**Corresponding address:** Department of Chemistry, Lady Brabourne College, Kolkata-700017, India. Email: [nayimsepay@yahoo.com](mailto:nayimsepay@yahoo.com)

**2-Oxo-N-propyl-2H-chromene-3-carboxamide (HH).** Yield – 80 %, colorless crystalline solid, M.P.

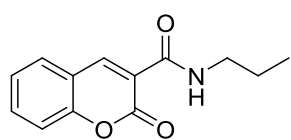

126–128 °C;  $^1\text{H}$  NMR (300 MHz,  $\text{CDCl}_3$ ):  $\delta$  8.92 (s, 1H, H-4), 8.83 (br s, 1H, NH), 7.62–7.70 (m, 2H, H-5, H-7), 7.36–7.43 (m, 2H, H-6, H-8), 3.41–3.47 (m, 2H, –NH–CH<sub>2</sub>–), 1.59–1.71 (m, 2H, –CH<sub>2</sub>–CH<sub>2</sub>–CH<sub>3</sub>), 0.99 (t,  $J$  = 7.2 Hz, 3H, CH<sub>3</sub>);  $^{13}\text{C}$  NMR (75 MHz,  $\text{CDCl}_3$ ):  $\delta$  161.5, 161.4, 154.4, 148.2, 133.9, 129.8, 125.2, 118.7, 118.6, 116.6, 41.6, 22.7, 11.5.

**8-Methoxy-2-oxo-N-propyl-2H-chromene-3-carboxamide (OME).** Yield – 76 %, colorless

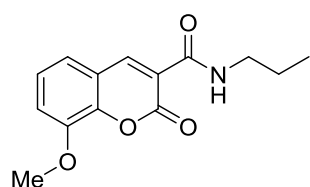

crystalline solid, M.P. 160–162 °C;  $^1\text{H}$  NMR (500 MHz,  $\text{CDCl}_3$ ):  $\delta$  8.90 (s, 1H, H-4), 8.87 (br s, 1H, –NH–), 7.25–7.32 (m, 2H, H-5, H-6), 7.20 (d,  $J$  = 7.5 Hz, 1H, H-7), 4.2 (s, 3H, OCH<sub>3</sub>), 3.44–3.48 (m, 2H, –NH–CH<sub>2</sub>–), 1.65–1.73 (m, 2H, –CH<sub>2</sub>–CH<sub>2</sub>–CH<sub>3</sub>), 1.00 (t,  $J$  = 7.5 Hz, 3H, CH<sub>3</sub>);  $^{13}\text{C}$  NMR (100 MHz,  $\text{CDCl}_3$ ):  $\delta$  161.2, 148.5, 147.2, 144.3, 125.2, 121.1, 119.5, 119.0, 115.6, 56.5, 41.7, 22.8, 11.6.

**6,8-Dichloro-2-oxo-N-propyl-2H-chromene-3-carboxamide (2CL).** Yield – 77 %, colorless

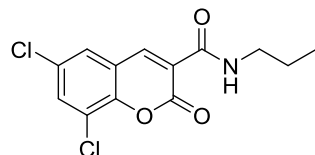

crystalline solid, M.P. 230–232 °C;  $^1\text{H}$  NMR (500 MHz,  $\text{CDCl}_3$ ):  $\delta$  8.81 (s, 1H, H-4), 8.68 (br s, 1H, –NH–), 7.69 (d,  $J$  = 2.0 Hz, 1H, H-5), 7.58 (d,  $J$  = 2.0 Hz, 1H, H-7), 3.41–3.45 (m, 2H, –NH–CH<sub>2</sub>–), 1.62–1.70 (m, 2H, –CH<sub>2</sub>–CH<sub>2</sub>–CH<sub>3</sub>), 1.00 (t,  $J$  = 7.5 Hz, 3H, CH<sub>3</sub>);  $^{13}\text{C}$  NMR (100 MHz,  $\text{CDCl}_3$ ):  $\delta$  160.6, 160.0, 148.8, 147.8, 146.8, 133.8, 130.6, 127.4, 122.8, 120.6, 41.9, 22.7, 11.6.

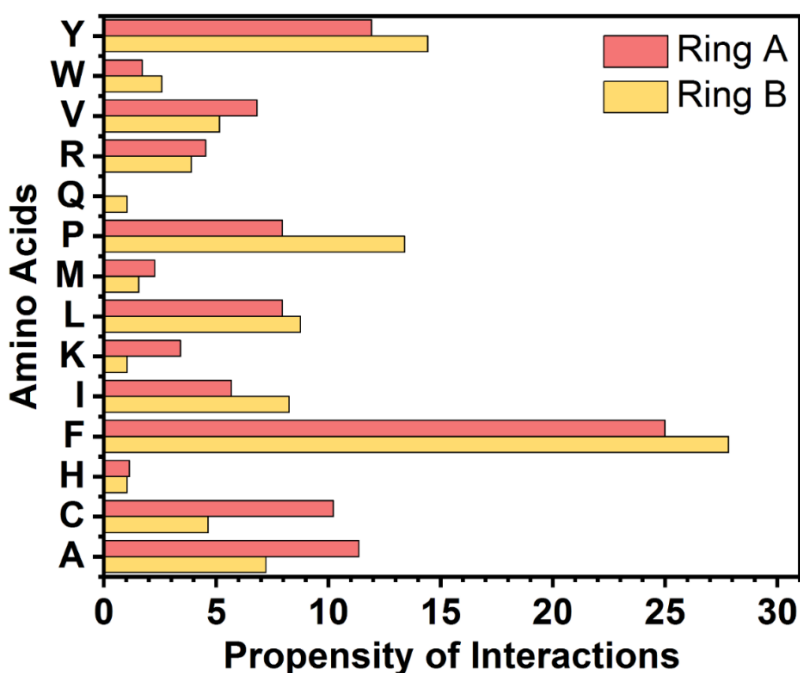

Figure S1. The propensities of interactions between coumarin moiety and the amino acids present in the active site of different protein.

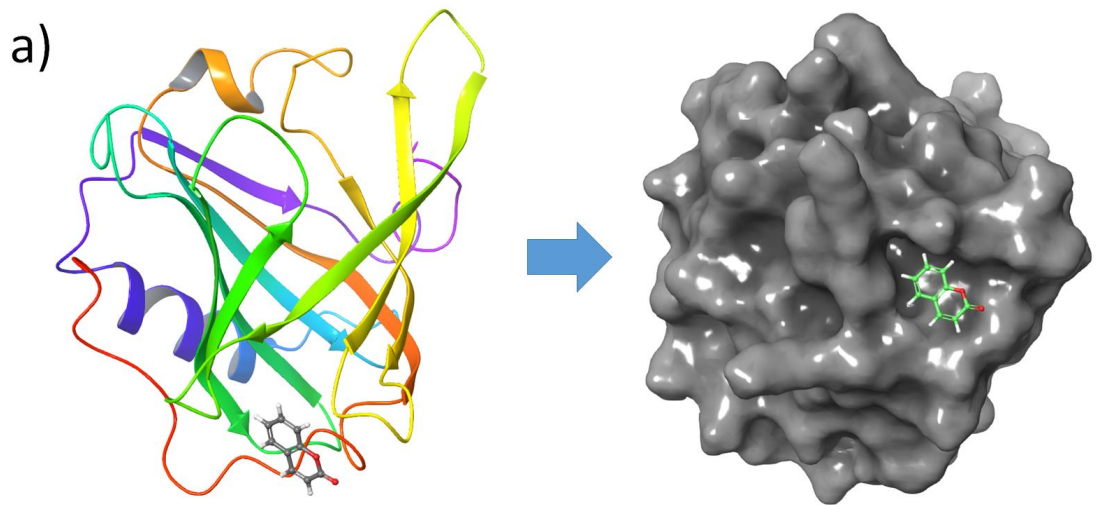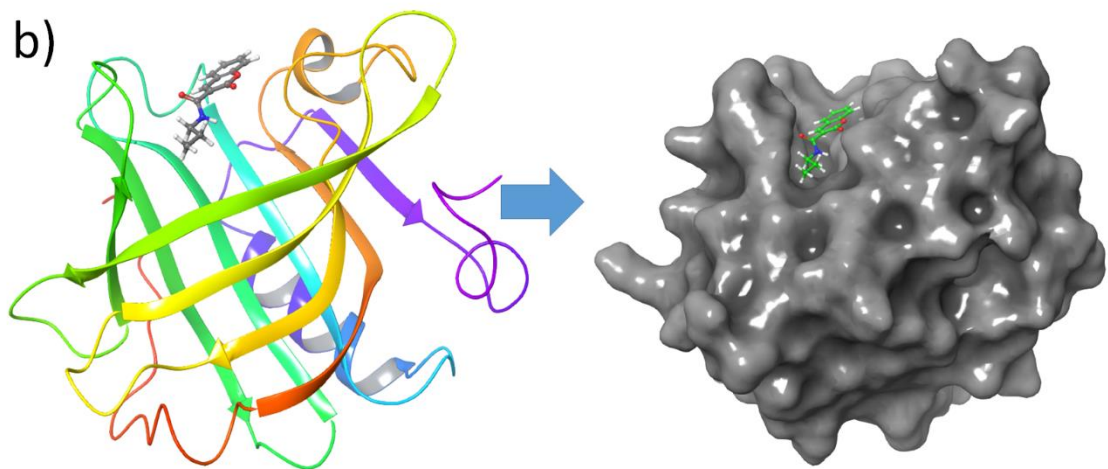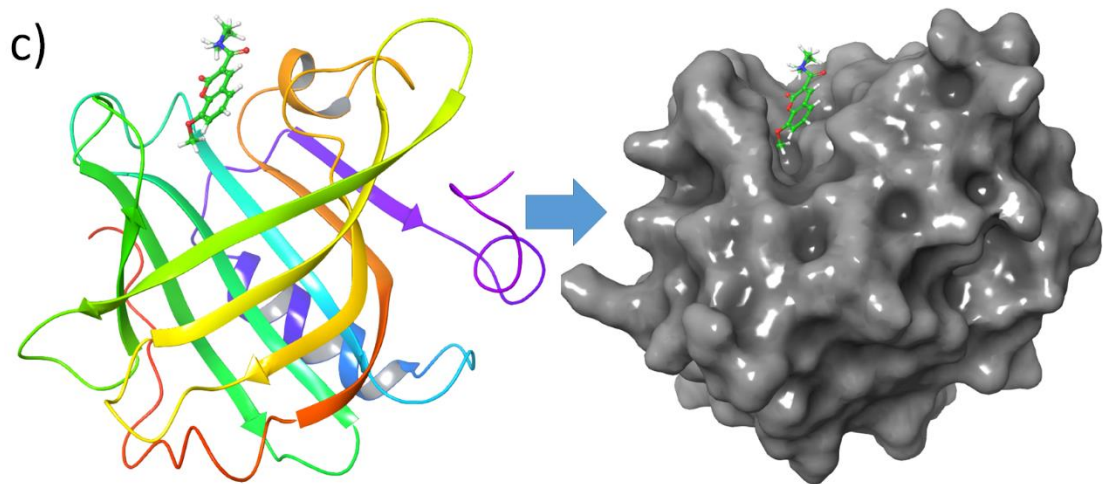

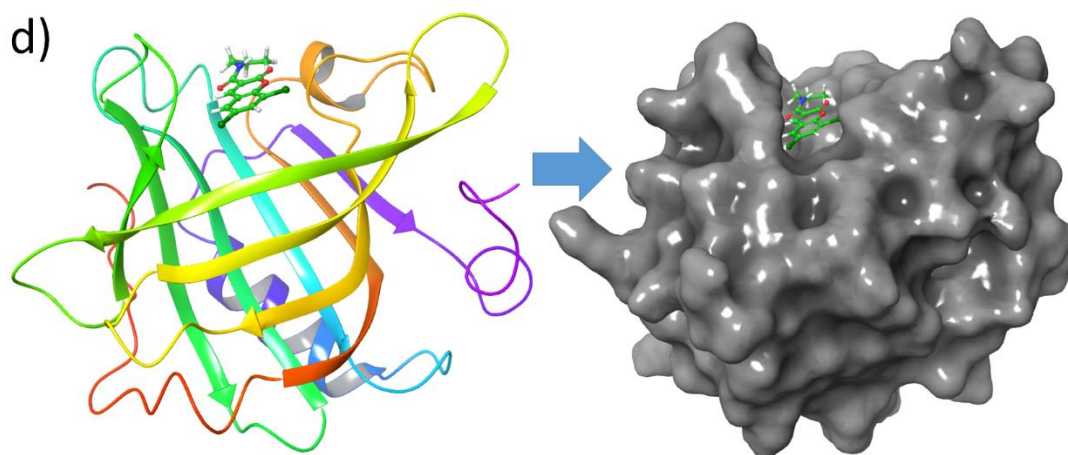

Figure S2. Docking pose of (a) coumarin, (b) HH, (c) OME, and (d) 2CL in the BLG protein

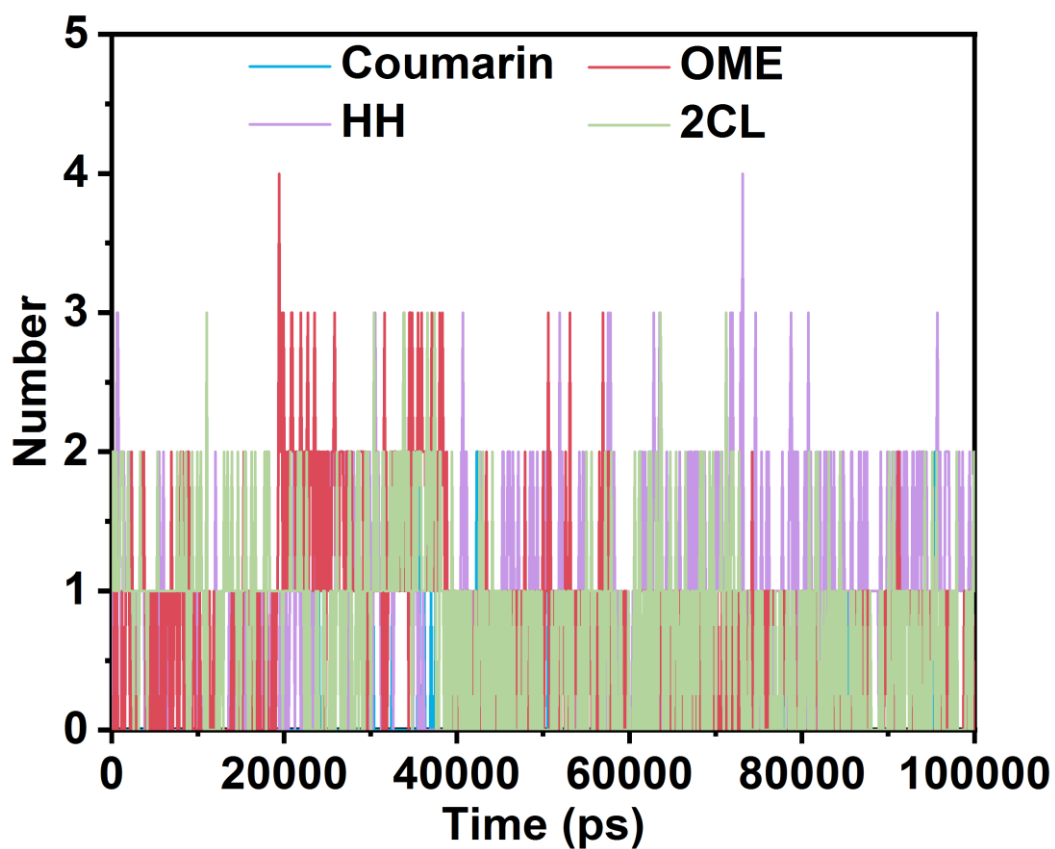

Figure S3. Number of H-bonds vs time plot of different coumarin compounds in their binding site found in the trajectory of MD simulation.

**Table S1:** PDB Ids of the proteins bound with small molecules having coumarin moieties.

|         |                                                                                                                                                                                                                                                                                                                                                                                                                                                                   |
|---------|-------------------------------------------------------------------------------------------------------------------------------------------------------------------------------------------------------------------------------------------------------------------------------------------------------------------------------------------------------------------------------------------------------------------------------------------------------------------|
| PDB IDs | 1aj6, 1cjf, 1kij, 1z11, 2bhj, 2pmj, 2v5w, 2v60, 2ya3, 3crb, 3jsx, 4cet, 4fz3, 4ige, 4igf, 4qa6, 4qa7, 5dc7, 5l13, 5xhs, 6akr, 6jib, 6kg2, 6ljm, 6ljn, 6r6v, 6tt0, 6udl, 6y1u, 6y1v, 7efq, 7lmn, 7lmo, 7lmp, 7lmq, 7lmr, 5l2o, 6dwm, 5ak2, 3ly2, 3u0f, 4ky2, 2qc6, 5exo, 1a54, 5l2n, 5l2m, 3l68, 4utl, 4uti, 3l66, 3l5m, 2v61, 2h90, 2h8z, 1z10, 1v5y, 1k3t, 3ml2, 1ttm, 1vdn, 1vai, 6mg5, 1gcz, 7jvv, 5z1b, 5efn, 5efk, 5dc8, 5dc6, 5d1c, 5bwl, 4upj, 4qa5, 2pwb. |
|---------|-------------------------------------------------------------------------------------------------------------------------------------------------------------------------------------------------------------------------------------------------------------------------------------------------------------------------------------------------------------------------------------------------------------------------------------------------------------------|

**Table S2:** RMSF of selected amino acid residues.

|              | I12  | Q13  | L31  | P38  | L39  | I71  | K75  | I84  | A86  | N90  |
|--------------|------|------|------|------|------|------|------|------|------|------|
| BLG          | 0.15 | 0.21 | 0.12 | 0.18 | 0.14 | 0.11 | 0.12 | 0.09 | 0.14 | 0.11 |
| BLG-Coumarin | 0.09 | 0.18 |      |      |      |      | 0.31 |      |      |      |
| BLG-HH       |      |      | 0.14 |      | 0.12 | 0.11 |      | 0.13 | 0.21 | 0.14 |
| BLG-OME      |      |      | 0.13 |      | 0.14 |      |      |      |      | 0.15 |
| BLG-2CL      |      |      | 0.12 | 0.16 | 0.14 | 0.15 |      | 0.14 | 0.25 | 0.17 |
